# Supplementary material for: Detection, Purification and Elucidation of Chemical Structure and Antiproliferative Activity of Taxol Produced by Penicillium chrysogenum
Source: MDPI journal article supplement (doi:10.3390/molecules25204822), 2020-10-20
Supplement: s1 [file s1]

**Supplementary Table 1.** Effect of different media on growth and taxol production by *P.chrysogenum*

| Broth medium | Taxol $\mu\text{g/L}$ | Fungal biomass g/L |
|--------------|-----------------------|--------------------|
| <b>PD</b>    | 170a $\pm$ 3.0        | 20a $\pm$ 2.0      |
| <b>ME</b>    | 85.63d $\pm$ 10.0     | 10b $\pm$ 3.0      |
| <b>YSE</b>   | 110c $\pm$ 10.0       | 15a $\pm$ 5.0      |
| <b>CD</b>    | 130.72b $\pm$ 10.0    | 17a $\pm$ 2.0      |

**Potato dextrose (PD)** (Zhang et al. 2009) ( $\text{g L}^{-1}$ ): potato infusion 200, D-glucose 20 . **Malt extract agar medium (ME)** (Bilgrami and Verma, 1981) composed of (g/L): 20.0, malt extract; 5.0 ,yeast extract ;20.0, agar agar and 1000 ml, distilled  $\text{H}_2\text{O}$ . **yeast Sucrose-extract (YSE)** (Scott et al., 1970) Composed of (g/L):40.0,sucrose ; 20.0 ,yeast extract ;15.0, agar-agar and 1000ml, distilled  $\text{H}_2\text{O}$ . **C`zapek`s Dox medium (CD)** (Oxoid, 1982) composed of (g/L): 30.0, sucrose; 3.0,  $\text{NaNO}_3$ ; 1.0 , $\text{KH}_2\text{PO}_4$ ; 0.5,  $\text{MgSO}_4 \cdot 7\text{H}_2\text{O}$ ;0.5,  $\text{KCl}$ ; 0.01,  $\text{FeSO}_4 \cdot 7\text{H}_2\text{O}$  and 20.0, agar-agar and 1000 ml distilled  $\text{H}_2\text{O}$ . Calculated mean is for triplicate measurements from two independent experiments  $\pm$  SD; means with different letters in the same column are considered statistically different (LSD test,  $p < 0.05$ )
